# Supplementary material for: Different Risk Factors for Erosive Tooth Wear in Rural and Urban Nepal: A National Study
Source: MDPI journal article supplement (doi:10.3390/ijerph18157766), 2021-07-22
Supplement: s1 [file s1]

**Table S1.** Association between erosive tooth wear (sum score 0–2 /  $\geq 3$ ) and explanatory variables (gender, location, school types, ethnic group, fizzy drinks consumption, fruits consumption, toothbrushing frequency, use of toothpaste, use of charcoal, use of miswak, body mass index, waist-hip ratio, and waist-height ratio) using logistic regression models for children (5–6-year-olds) and adolescents (12- and 15-year-olds).

| Explanatory variables    | Model 1<br>UOR (95% CI) | Model 2<br>UOR (95% CI) |
|--------------------------|-------------------------|-------------------------|
| Gender                   |                         |                         |
| Boys                     | 0.94 (0.58–1.53)        | 1.07 (0.74–1.55)        |
| Girls                    | 1                       | 1                       |
| Location                 |                         |                         |
| Urban                    | 0.64 (0.39–1.04)        | 0.41 (0.28–0.60) **     |
| Rural                    | 1                       | 1                       |
| School types             |                         |                         |
| Private                  | 0.76 (0.46–1.23)        | 0.37 (0.23–0.59) **     |
| Public                   | 1                       | 1                       |
| Ethnic group             |                         |                         |
| Brahman/Chhetri          | 1.65 (0.93–2.95)        | 1.38 (0.90–2.11)        |
| Tarai Madeshi & Muslim   | 1.65 (0.53–5.13)        | 1.33 (0.64–2.77)        |
| Dalit                    | 2.24 (0.96–5.20)        | 1.40 (0.71–2.80)        |
| Janajati & Newar         | 1                       | 1                       |
| Fizzy drinks consumption |                         |                         |
| Frequent                 | 0.79 (0.41–1.53)        | 1.08 (0.69–1.70)        |
| Never & seldom           | 1                       | 1                       |
| Fruits consumption       |                         |                         |
| Frequent                 | 1.34 (0.72–2.46)        | 0.97 (0.67–1.41)        |
| Never & seldom           | 1                       | 1                       |
| Toothbrushing frequency  |                         |                         |
| Once daily or less       | 0.32 (0.11–0.93) *      | 1.33 (0.84–2.10)        |
| Twice daily or more      | 1                       | 1                       |
| Use of toothpaste        |                         |                         |
| Yes                      | 0.52 (0.15–1.85)        | -                       |
| No                       | 1                       | -                       |
| Use of charcoal          |                         |                         |
| Yes                      | 3.35 (0.66–17.09)       | 2.51 (1.44–4.37) *      |
| No                       | 1                       | 1                       |
| Use of miswak            |                         |                         |
| Yes                      | 1.65 (0.29–9.23)        | 1.24 (0.69–2.21)        |
| No                       | 1                       | 1                       |
| Body mass index          |                         |                         |
| Low                      | 1.58 (0.70–3.56)        | 0.98 (0.57–1.68)        |
| High                     | 0.96 (0.41–2.23)        | 0.82 (0.39–1.71)        |
| Normal                   | 1                       | 1                       |
| Waist-Hip ratio          |                         |                         |
| Obese                    | 1.92 (1.02–2.62) *      | 1.30 (0.80–2.13)        |
| Normal                   | 1                       | 1                       |
| Waist-Height ratio       |                         |                         |
| Obese                    | 1.11 (0.61–2.01)        | 1.12 (0.45–2.76)        |
| Normal                   | 1                       | 1                       |

\* $p < 0.05$ ; \*\* $p < 0.001$ ; UOR: unadjusted odds ratio; 95 % CI: 95% confidence interval. Model 1 was performed for children aged 5–6-years; Model 2 was performed for adolescents aged 12- and 15-year-olds.
